# Supplementary material for: The fabrication of color-tunable organic light-emitting diode displays via solution processing
Source: PubMed Central journal article supplement — Light Sci Appl. 2017 Nov 17;6(11):e17094–. doi: 10.1038/lsa.2017.94 (PMC6062041; doi:10.1038/lsa.2017.94), 2017-11-17
Supplement: lsa201794x1.pdf [file lsa201794x1.pdf]

Supporting information for

## **The fabrication of color-tunable organic light-emitting diode displays via solution processing**

*Fei Guo<sup>1,2</sup>, Andre Karl<sup>1</sup>, Qifan Xue<sup>3</sup>, Kai Cheong Tam<sup>4</sup>, Karen Forberich<sup>1</sup> and Christoph J. Brabec<sup>1,4</sup>*

<sup>1</sup>Institute of Materials for Electronics and Energy Technology (i-MEET), Friedrich-Alexander University Erlangen-Nürnberg, Martensstrasse 7, 91058 Erlangen, Germany

<sup>2</sup>Institute of New Energy Technology, College of Information and Technology, Jinan University, 510632 Guangzhou, P. R. China

<sup>3</sup>Institute of Polymer Optoelectronic Materials and Devices, State Key Laboratory of Luminescent Materials and Devices, South China University of Technology, Wushan road 381, 510640 Guangzhou, P. R. China

<sup>4</sup>Bavarian Center for Applied Energy Research (ZAE Bayern), Haberstrasse 2a, 91058 Erlangen, Germany

Correspondence: F Guo, Email: feiguo86@gmail.com; K Tam, Email: Eric.Tam@zae-bayern.de; C Brabec, Email: christoph.brabec@fau.de

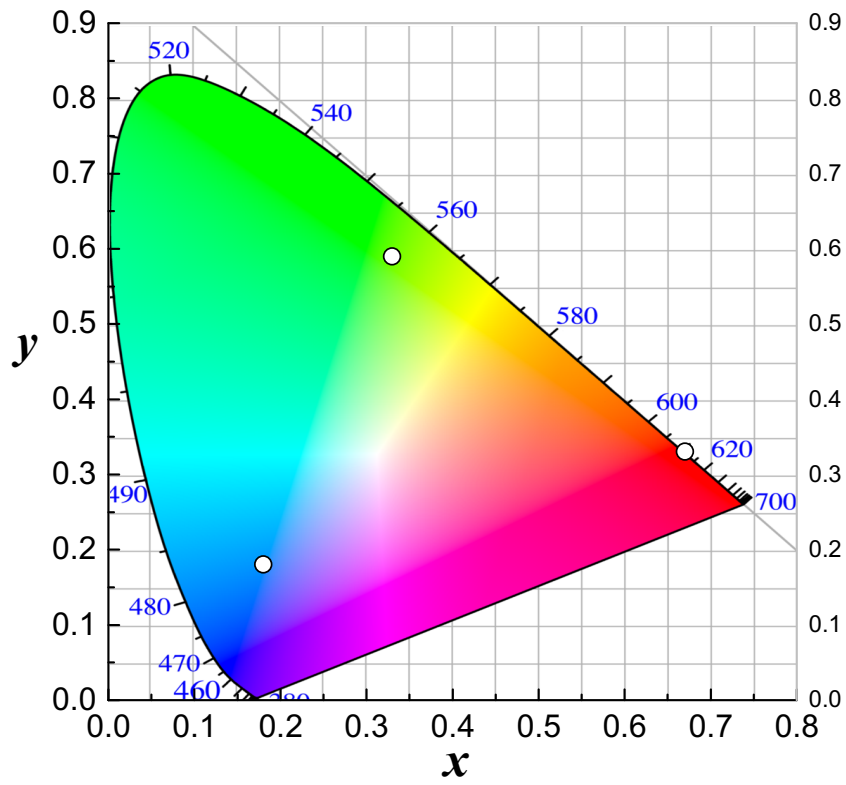

**Supplementary Figure 1** | CIE 1931 color space chromaticity coordinate of the three reference OLED cells.

**a**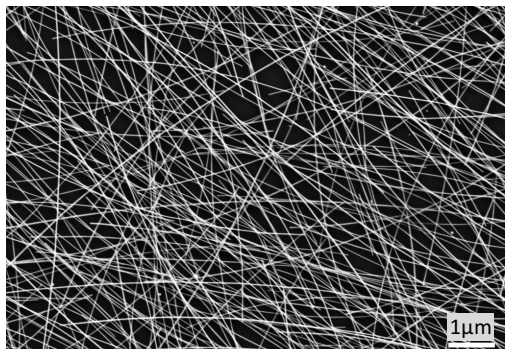**b**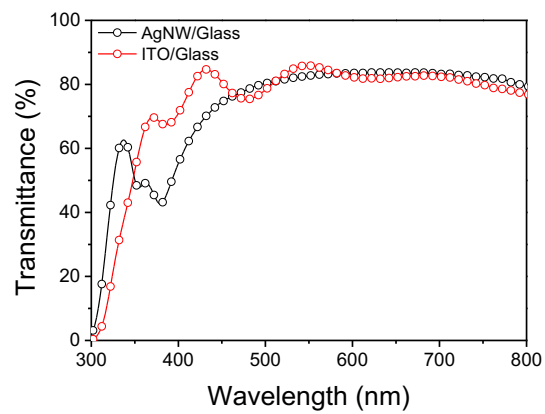

**Supplementary Figure 2 | a**, SEM image of the AgNW film deposited from isopropanol based solution. **b**, Transmittance spectra of the AgNW film deposited on glass substrate. As a comparison, the commonly used ITO/Glass electrode is plotted.

**a**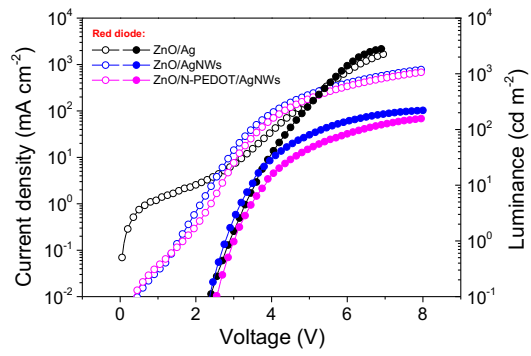**b**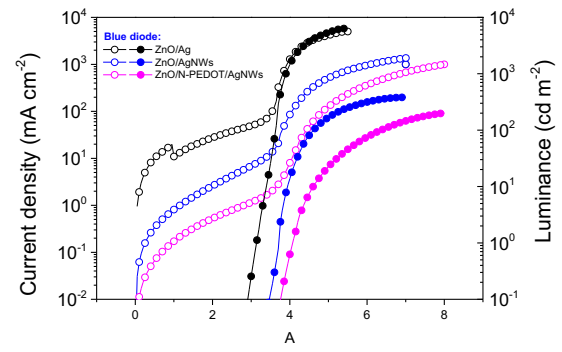

**Supplementary Figure 3** | J-V-L characteristics of the red (a) and blue (b) emitting OLED devices with different top electrodes.

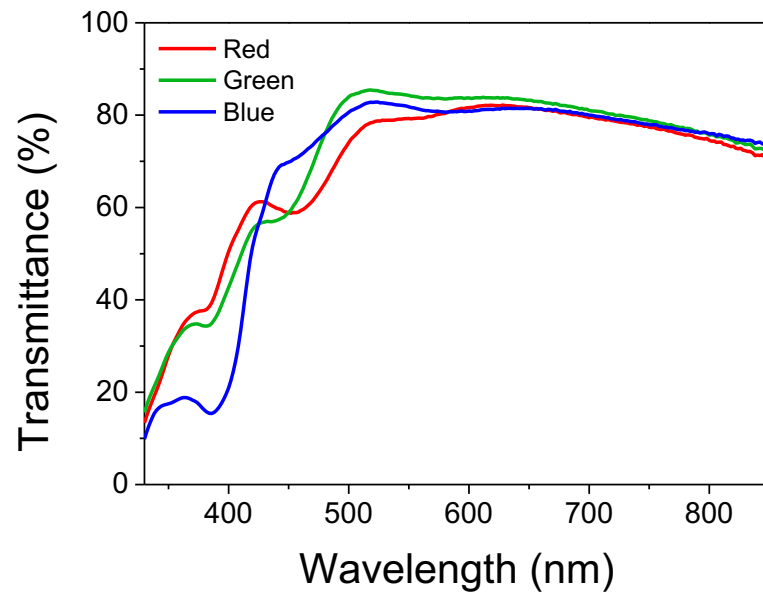

**Supplementary Figure 4** | UV-vis transmission spectra of the prepared semitransparent red, green and blue emitting OLED devices in their bleached state.

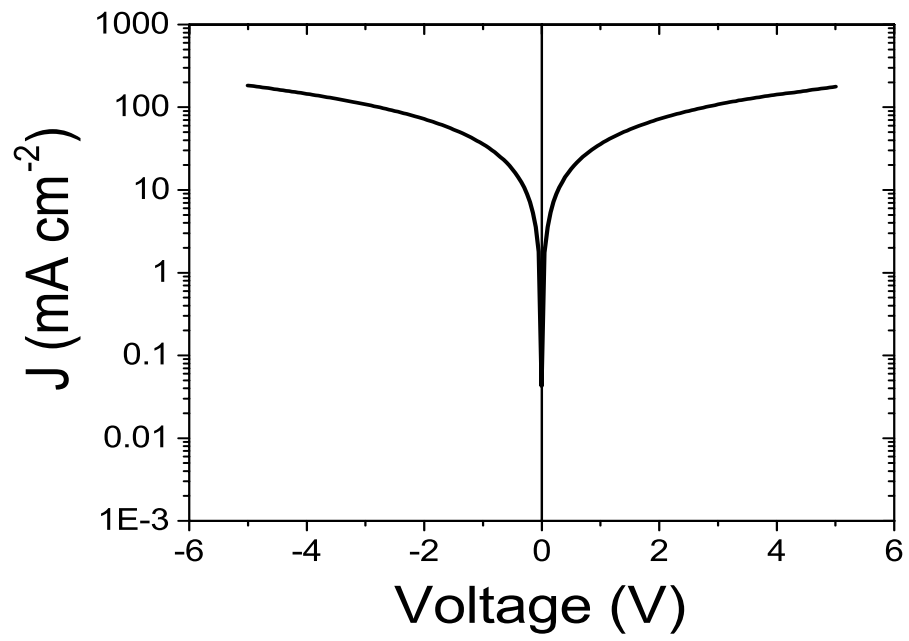

**Supplementary Figure 5** | J-V characteristic of the interlayer stack of “ITO/ZnO/N-PEDOT/AgNW”.

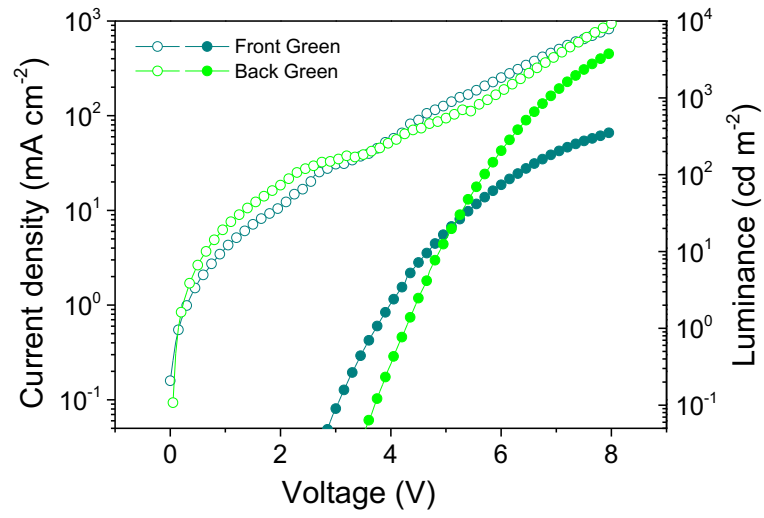

**Supplementary Figure 6** | J-V-L characteristics of the tandem OLED device where the green emitter is used as both the bottom and top subdiodes.

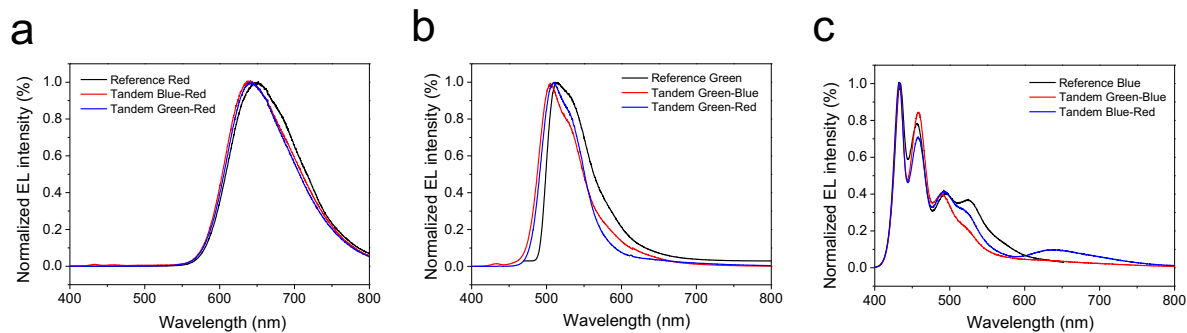

**Supplementary Figure 7** | Normalized EL spectrum of the Red (a), Green (b) and Blue (c) subdiodes measured in their tandem devices and compared to the respective single-junction reference devices.



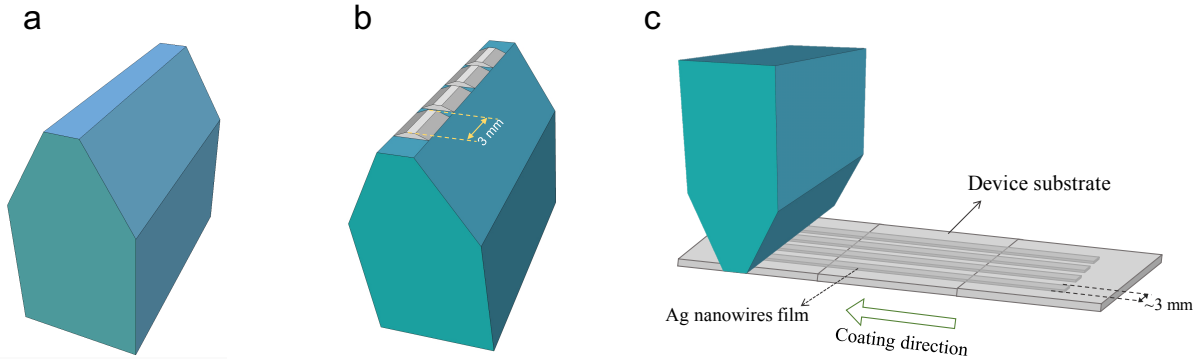

**Supplementary Figure 8** | Schematic illustration of the modified doctor-blade for solution-deposition of the four stripes AgNW electrodes. (a) bottom view of a normal doctor blading coater. (b) bottom view of a modified doctor blading, where 4 tapes (3 mm in width) are attached to the blade with an interval of 1 mm. (c) Side view of blading the AgNW films. It should be noted that the modified doctor blade enables coating AgNW stripes in a specific width ( $\sim 3$  mm), rather than fully covering the substrate ( $25 \text{ mm} \times 25 \text{ mm}$ ).

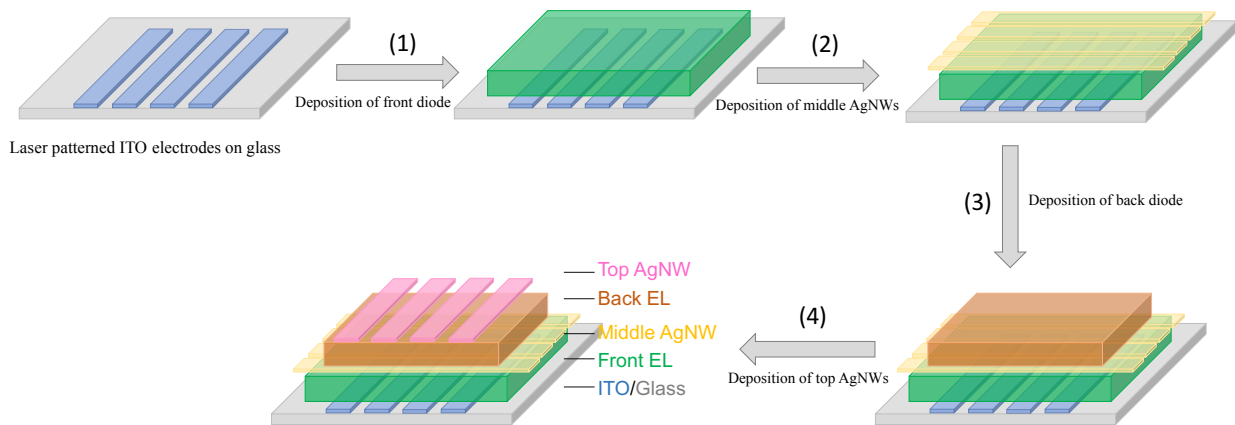

**Supplementary Figure 9** | Schematic diagram of the display fabrication. (1) On laser patterned ITO substrate, the first four layers with sequence of “PEDOT:PSS/emitting layer/ZnO/N-PEDOT” was successively deposited using the normal blade coating. (2) Deposition of the middle four AgNW electrodes in stripe-shape using the modified doctor blade shown in **Supplementary Figure 8**. (3) Deposition of back diode with layer sequence of “PEDOT:PSS/emitting layer/ZnO” using the normal blade coating. (4) Deposition of the top four AgNW electrodes in stripe-shape using the modified doctor blade.
